1 **How effective are acoustic signals in territorial defence in the Lusitanian toadfish?**

2

3

4 Carlotta Conti<sup>2</sup>, Paulo J. Fonseca<sup>1</sup>, Marta Picciulin<sup>3f</sup>, M. Clara P. Amorim<sup>\*2</sup>

5

6 <sup>1</sup> Departamento de Biologia Animal, Centro de Biologia Ambiental, Faculdade de  
7 Ciências, Universidade de Lisboa, Lisboa, Portugal.

8 <sup>2</sup> MARE – Marine and Environmental Sciences Centre, ISPA - Instituto

9 Universitário, Lisboa, Portugal.

10 <sup>3</sup>Facoltà di Scienze Matematiche, Fisiche e Naturali, Dipartimento di Biologia — CSEE,

11 University of Trieste, Italy.

12 <sup>f</sup>Present address: Independent Scholar, Italy.

13

14 \*Corresponding author: [amorim@ispa.pt](mailto:amorim@ispa.pt)

15

16

17 Key words: Territorial behaviour, muting experiments, sound production, ‘keep-out’  
18 signal, Batrachoididae, teleost fish.

19

20

21

## SUMMARY

22  
23  
24  
25  
26  
27  
28  
29  
30  
31  
32  
33  
34  
35  
36  
37  
38  
39  
40  
41  
42  
43

The function of fish sounds in territorial defence, in particular its influence on the intruder's behaviour during territorial invasions, is poorly known. Breeding Lusitanian toadfish males (*Halobatrachus didactylus*) use sounds (boatwhistles) to defend nests from intruders. Results from a previous study suggest that boatwhistles function as a 'keep-out signal' during territorial defence. To test this hypothesis we performed territorial intrusion experiments with muted Lusitanian toadfish. Subject males were assigned to three groups: muted, sham and unmanipulated. Males were muted by making a cut and deflating the swimbladder (the sound producing apparatus) under anaesthesia. Sham males suffered the same surgical procedure except the swimbladder cut and deflation. Toadfish nest-holder males reacted to intruders mainly by emitting sounds (sham and unmanipulated) and less frequently with escalated fights. When the nest-holder produced a boatwhistle, the intruder fled more frequently than expected by chance alone. Muted males experienced a higher number of intrusions than the remaining groups probably due to their inability to vocalise. Together, our results show that fish acoustic signals are effective deterrents in nest/territorial intrusions, similar to bird song.

Key-words: Batrachoididae, *Halobatrachus didactylus*, 'keep-out' signal, muting experiments, sound production, teleost fish, territorial behaviour

## INTRODUCTION

44  
45  
46  
47  
48  
49  
50  
51  
52  
53  
54  
55  
56  
57  
58  
59  
60  
61  
62  
63  
64  
65  
66  
67  
68  
69  
70  
71  
72  
73  
74  
75  
76  
77

An individual fish's probability of surviving and reproducing depends to a large extent on its social behaviour in which communication takes a major role. In contests for the establishment of social hierarchies and territories, differences in fighting ability between contestants influence the outcome of disputes (Parker, 1974; Arnott and Elwood 2009). Fighting ability or resource-holding potential (Parker, 1974) is often related to size but also to other factors such as development of weaponry, physiological state, sex and residency status (Turner and Huntingford, 1986; Enquist and Leimar, 1987; Arnott and Elwood, 2009). Hence, when a contest occurs, opponents typically start a ritualized sequence of displays that facilitate opponent assessment and when asymmetries between contestants are large the contest should be settled without the need for costly combats (Enquist and Leimar, 1983, 1987).

Empirical evidence shows that acoustic signals are often used in mutual assessment during agonistic interactions in mammals (Clutton-Brock and Albon, 1979), birds (Krebs, 1976; Krebs et al., 1978; Searcy and Beecher, 2009), anurans (Davies & Halliday, 1978; Cocroft and Ryan, 1995) and fishes (Ladich and Myrberg, 2006), as acoustic features may signal the sender's quality. For example, lower frequency calls usually reflect larger body size and hence better competitive ability as larger vocal organs and vocal tracts produce and radiate lower frequencies more efficiently (Bradbury and Vehrencamp, 1998). Also, other features such as calling rate or sound amplitude may be condition-dependent (Clutton-Brock and Albon, 1979; Prestwich, 1994; Wyman et al., 2008; Amorim et al., 2010a).

In fish, different studies have shown that several properties of acoustic signals are related to body size. Larger fish tend to produce lower frequency (e.g. Ladich, 1998; Myrberg et al., 1993; Lobel and Mann, 1995; Connaughton et al., 2000), louder (Ladich, 1998; Connaughton et al., 2000; Lindström and Lugli, 2000; Amorim et al., 2013) and longer sounds (Wysocki and Ladich, 2001; Amorim and Hawkins, 2005; Amorim and Neves, 2008) than smaller individuals. Also, the level of calling activity may reflect the amount of fat reserves (Amorim et al., 2010a, 2013; Pedroso et al., 2013).

Less known is how acoustic communication affects agonistic interactions in fish, but in at least a few species sounds seem to be used in mutual assessment and influence fight outcome (reviewed in Ladich and Myrberg, 2006; Raffinger and Ladich, 2009). However, studies on the function of sounds in territorial defence are scarce, in particular

78 in its influence on the intruder's behaviour during territorial invasions by conspecifics.  
79 For example, playing back click sounds to skunk loaches *Yasuhikotakia morleti* during  
80 territorial intrusions made residents increase the number of lateral displays performed at  
81 intruders (Valinski and Rigley, 1981) while the playback of ratchet sounds to brown  
82 bullhead catfish *Ameiurus nebulosus* decreased the number of attacks residents made at  
83 intruders (Rigley and Muir, 1979). These experiments clearly show that sounds can have  
84 a major role in modulating the resident's territorial behaviour. However, the deterrent  
85 function of sounds on territorial intrusion has seldom been demonstrated. Playbacks of  
86 conspecific sounds in the absence of a resident male have been shown to have a deterrent  
87 effect in territorial intrusion in the bicolor damselfish *Stegastes partitus* (Myrberg, 1997)  
88 and in the painted goby *Pomatoschistus pictus* (Pereira et al., 2014), equivalent to the  
89 'keep-out' effect of bird song (Krebs, 1976).

90 To experimentally test the 'keep-out signal' hypothesis we used the vocal  
91 Lusitanian toadfish *Halobatrachus didactylus* (Bloch and Schneider 1801). In the  
92 reproductive season (May to July in Portugal) males occupy rock crevices or excavate  
93 under rocks in shallow water and attract females with long tonal sounds (c. 800 ms)  
94 named boatwhistles (dos Santos et al., 2000; Modesto and Canário, 2003; Amorim et al.,  
95 2006). Females deposit their eggs under the roof of the nest and males guard the eggs of  
96 multiple females until the offspring is able to swim away (Ramos et al., 2012; Roux,  
97 1986). During this period competition for nests is high (Amorim et al., 2010b) and males  
98 actively defend the nest from intruders with visual and acoustic behaviour (Vasconcelos  
99 et al., 2010; Ramos et al., 2012). Recently, Vasconcelos and colleagues (Vasconcelos et  
100 al., 2010) have proposed that the boatwhistle functions as a 'keep-out' signal and  
101 suggested that vocalizing may be an effective means to avoid territorial intrusions and  
102 escalated fights in the Lusitanian toadfish. However, the study of Vasconcelos et al.  
103 (2010) cannot exclude the possibility that chemical or other cues could also be at play.  
104 As in the Lusitanian toadfish vocalizations are generated by vibration of the swimbladder  
105 caused by the contraction of intrinsic sonic muscles (dos Santos et al., 2000), muting can  
106 be easily achieved by making a cut and deflating the swimbladder under anaesthesia.  
107 Males can still contract the sonic muscles but sounds become inaudible while fish  
108 behaviour appears unaltered. Here we used muting experiments to verify if acoustic  
109 signals (i.e. boatwhistles) are effective deterrents of territorial intrusions in this species.  
110 We compared the dynamics of territorial defence and the number of intrusions among  
111 muted and control males (sham-operated and unmanipulated residents). We further

112 tested if intruders fled more frequently than expected by chance alone when the nest-  
113 holder made a boatwhistle.

## 116 RESULTS

### 118 Interaction dynamics

119 Intruding males readily swam towards the shelters and often approached and tried to  
120 enter them. 44% of the resident males ( $N = 57$ ) experienced approaches (range: 0–7  
121 approaches) and 84% experienced partial or total intrusions (range: 0–9). Muted fish  
122 experienced fewer approaches (Kruskal-Wallis test:  $N = 57$ ,  $H = 6.78$ ,  $P < 0.05$ ) but a  
123 greater number of intrusions ( $H = 9.65$ ,  $P < 0.01$ ) than other groups (Fig. 1). However,  
124 the total number of interactions (approach + intrusion) did not differ among groups ( $H =$   
125  $4.99$ ,  $P > 0.05$ ; Fig. 1).

126 The resident males responded to intruders' approaches by either producing  
127 sounds (mainly boatwhistles) or exhibiting escalated fight (mostly bites and mouth  
128 wrestling). During intrusions, the nest-holder response was similar but the proportion of  
129 escalated fights was higher and of vocalizations lower than during approaches (Table 1).  
130 Also, in contrast to approaches, the production of boatwhistles could proceed to a fight if  
131 the intrusion persisted. In many occasions there was no apparent reaction from the  
132 resident ('no reaction').

133 We found an effect of treatment on the number of 'no reactions' (Kruskal-Wallis  
134 test: Approach,  $N = 25$ ,  $H = 7.04$ ,  $P < 0.05$ ; Intrusion,  $N = 8$ ,  $H = 10.56$ ,  $P < 0.01$ ) but not  
135 on escalated fights (Approach,  $H = 2.36$ ,  $P > 0.05$ ; Intrusion,  $H = 1.76$ ,  $P > 0.05$ ) during  
136 approaches and intrusions. Muted fish showed the highest occurrences of 'no reaction'  
137 (Fig. 2 and 3).

138 The duration of interactions (one-way ANOVA,  $F_{2,144} = 1.22$ ,  $P > 0.05$ ) and of  
139 interaction sequences ( $F_{2,88} = 0.91$ ,  $P > 0.05$ ) did not differ among groups (Fig. 4). The  
140 production of boatwhistles (BW) did not affect interaction duration in any interaction  
141 type: approach, intrusion or approach followed by intrusion (two-way ANOVA, BW:  
142  $F_{1,138} = 0.12$ ,  $P > 0.05$ ; Interaction type:  $F_{2,138} = 19.53$ ,  $P < 0.001$ ; BW x interaction type  
143  $F_{2,138} = 0.05$ ,  $P > 0.05$ ).

144 There were marginally non-significant differences in takeovers of muted and  
145 vocal fish nests ( $\chi^2 = 3.25$ , d.f. = 1,  $P = 0.07$ ). Overall, nest takeovers occurred

146 infrequently. From the 48 residents that experienced intrusions 14 got replaced. 23% (3  
147 in 13), 18% (3 in 17) and 44% (8 in 18) of unmanipulated, sham-operated and muted  
148 males got replaced by intruders, respectively. We found no differences in time until nest  
149 takeover (i.e. sequence of interaction duration until nest takeover) among treatments  
150 ( $F_{2,12} = 0.42$ ,  $P > 0.05$ ; Fig. 4). In nest takeovers, intruders and residents were of similar  
151 sizes, the difference in total lengths averaging 0.9%.

152

153

### **Intruder response to resident's behaviour**

154 Intruders usually fled when they heard a boatwhistle either while approaching (85%,  $N =$   
155 33) or intruding a nest (76%,  $N = 25$ ). The probability of fleeing upon hearing a  
156 boatwhistle was significantly higher than what expected at random both during  
157 approaches (binomial test,  $N = 33$ ,  $P < 0.001$ ) or intrusions (binomial test,  $N = 25$ ,  $P <$   
158 0.05). When intruders received escalated agonistic behaviour the chances of fleeing were  
159 also higher than random (binomial test,  $N = 46$ ,  $P < 0.01$ ) and they fled 74% of times.  
160 When intrusions were successful, the intruder either stayed in the shelter with the  
161 resident or replaced him.

162

163

164

## **DISCUSSION**

165

166 Experimental approaches to investigate the functional significance of agonistic sounds in  
167 fish and other animals include sound exposure through playback, exclusion of fish  
168 sounds by keeping opponents in separate tanks or by muting individuals, the use of  
169 mirrors to level visual interactions while testing the function of sound, and correlative  
170 analyses (Ladich and Myrberg, 2006). Although muting procedures are more invasive  
171 than the widely used playback approach (McGregor, 1992), they avoid the concurrent  
172 presentation of acoustical and visual stimuli in playback tests, usually needed to elicit  
173 behavioural responses in fish (Ladich and Myrberg, 2006). Muting experiments have  
174 only been carried out twice (Valinski and Rigley, 1981; Ladich et al., 1992) probably  
175 because many vocal fish species have unknown sound-producing mechanisms (Ladich &  
176 Fine, 2006). Also, when the mechanism is known its deactivation typically results in  
177 behaviour alteration or impairment (Ladich and Myrberg, 2006). However, in fishes that  
178 use swimbladder mechanisms, such as the Lusitanian toadfish, swimbladder deflation  
179 does not impair sonic muscle contraction but results in a marked decrease of sound

180 amplitude (Skoglund, 1961), causing the sounds to become inaudible while behaviour  
181 remains apparently unaltered. Such fish species are ideal to investigate the function of  
182 acoustical signalling in social contexts since the outcome of social interactions of mute  
183 fish can be compared with those of vocal animals. Unlike most fish species (Ladich and  
184 Myrberg, 2006), the Lusitanian toadfish has the advantage that a great component of  
185 agonistic interactions relies on acoustic signalling performed with no accompanying  
186 visual displays (Vasconcelos et al., 2010), thus avoiding the confounding effects of the  
187 interplay of different sensory channels. Here, we experimentally investigated if sounds  
188 (boatwhistles) made by the Lusitanian toadfish have an active role in preventing  
189 territorial intrusion by comparing territorial defence between muted fish and two control  
190 groups, sham-operated and unmanipulated males.

191 We have found a treatment effect on the number of approaches and intrusions  
192 experienced by nest-holders. Muted fish had more intrusions and fewer approaches than  
193 the remaining groups, but experienced a similar number of interactions (approach +  
194 intrusion). These results suggest that intruders initiated interactions equally with all  
195 groups but were more likely to proceed to intrusions in muted males' nests, likely  
196 because these males were not able to make audible sounds. This is consistent with the  
197 observed high numbers of 'no reactions' in muted males. Muted fish likely attempted to  
198 defend their shelters by making sounds but as this species typically emits sounds with no  
199 accompanying visual displays, attempts of sound production could not be detected.  
200 Similarly, in the grasshopper *Chorthippus biguttulus*, males muted by removing the  
201 forewings, fictively stridulated with the same frequency and movement pattern as intact  
202 animals (Kriegbaum and von Helversen, 1992).

203 Nest-holder Lusitanian toadfish mainly reacted to approaches and intrusions with  
204 sounds and less often with escalated fight. There was no significant difference in the  
205 levels of escalated fight among the three treatment groups either as a reaction to  
206 approaches or to intrusions, suggesting that fish did not compensate the lack of ability to  
207 produce sounds with increased levels of aggressiveness. In contrast, muted skunk loach  
208 nest-holders increased the number of visual displays, but lowered attacks, in comparison  
209 to control fish in an attempt to prevent nest intrusion (Valinski and Rigley, 1981).

210 Importantly, when nest-holders made boatwhistles, intruders tended to flee. In  
211 this context, unmanipulated and sham groups had higher probabilities to prevent  
212 territorial intrusion than muted fish. Escalated fights also had a higher than expected  
213 chance to expel the intruder but are more costly since they can incur physical injuries

214 and are energetically demanding. Consistent with the ‘keep-out’ signal hypothesis, an  
215 average of 44% of intrusions resulted in nest takeovers in muted males, against 20%  
216 observed for vocal males. The difference in the proportion of nest takeovers seems to be  
217 caused by the ability to vocalise and not by the intruder’s size. The difference in total  
218 length between expelled nest-holders and successful intruders was for the three treatment  
219 groups approximately 1%, though size differences in our experiments were generally  
220 higher with a mean difference of 9%. Altogether, the present data strongly suggests that  
221 boatwhistles are effective keep-out signals lowering the probability of territorial  
222 intrusions and likely of nest takeovers.

223 Other studies support the importance of acoustic signals in winning contests and  
224 in deterring territorial intrusion. In croaking gouramis *Trichopsis vittata*, territorial males  
225 matched in size with the opponent, had a significantly higher chance to win the dispute  
226 when they were vocal than when muted. However when size differences increased,  
227 larger fish tended to win the fight irrespectively of the ability to vocalise (Ladich et al.,  
228 1992). Muted skunk loaches, also experienced more intrusions than control fish, but  
229 differences in sizes between contestants were not mentioned (Valinski and Rigley,  
230 1981). The deterrent effect of sounds on territorial intruders has been shown for the  
231 bicolor damselfish (Myrberg, 1997) and for the painted goby (Pereira et al., 2014) as  
232 intruders took longer to enter unoccupied territories/nests associated with conspecific  
233 sound playback then silent ones. The deterrent effect of agonistic acoustic signals on  
234 territorial intrusions has traditionally been described for birds. Muting adversely affects  
235 the ability to acquire and defend territories (e.g. McDonald, 1989) and song playback  
236 from territories after removal of owners delays occupation by intruders (e.g. Krebs et al.,  
237 1978).

238 Interestingly, the duration of interactions, including time to nest takeover, did not  
239 differ between muted and vocal fish. This suggests that the dynamics of mutual  
240 assessment, that involves reiteration of behaviours between opponents (Enquist and  
241 Leimar, 1983, 1987), was not altered by differences in vocal activity.

242 Our muting experiments did not cause behavioural alteration in muted fish as all  
243 groups showed similar levels of escalated fights. Muting experiments in different taxa  
244 include examples where the subject’s behaviour remains unaltered after being silenced.  
245 For example, croaking gouramis males prevented to make sounds by cutting the two  
246 enhanced pectoral fin tendons involved in sound production, exhibited normal swimming  
247 movements and agonistic behaviour (Ladich et al., 1992). Also in the study of Davies



248 and Halliday (1978) silencing toad (*Bufo bufo*) males, did not seem to alter reproductive  
249 or agonistic behaviour.

250 Together, the results of this study provide experimental evidence of the deterrent  
251 function of agonistic sounds in territorial defence in fish. We show that acoustic signals  
252 play an active role in territorial defence, decreasing the probability of escalated fight and  
253 of intrusions, and thus likely reducing nest takeovers.

254

255

256

## MATERIALS AND METHODS

257

258

### Test males and maintenance

259 Prior to the beginning of the breeding season, 60 artificial hemicylinder concrete shelters  
260 (50 cm long, 30 cm wide and 20 cm height) were placed approximately 1.5 m apart in  
261 three rows, along an intertidal area of Tagus River estuary (Military Air Force Base,  
262 Montijo, Portugal; 38° 42'N, 8° 58'W). Fish spontaneously occupied these shelters and  
263 we were able to access the animals at low spring tides during May to July 2011. We also  
264 used some fish caught by local fisherman. Only territorial males were used and they  
265 were identified by gently pressing their abdomen near the urogenital opening since they  
266 have accessory glands that release a dark-brown seminal fluid, unlike females and  
267 sneaker males (Modesto and Canário, 2003). We maintained experimental males in  
268 round stock tanks (plastic swimming pools 2 m in diameter and water depth of 0.5 m)  
269 near the intertidal toadfish nesting area where males were collected. Stock and  
270 experimental tanks (similar to the stock tanks but with 2.5 m diameter) were placed on  
271 the sand just above the high tide shoreline under a shadow net cover held 170 cm high to  
272 prevent excessive solar radiation and water heating. Water temperature varied from 18 to  
273 26°C (mean = 21.4°C), within the range of the estuary water temperature variation  
274 during the same period. The renovation of water was done every 2–3 days, by pumping  
275 water directly from the estuary. A natural light cycle was maintained as the stock tanks  
276 were outdoors.

277

278

### Territorial intrusion protocol

279 We carried out territorial intrusion experiments with resident and intruder fish to  
280 simulate a context of male–male competition during territorial defence. Resident males  
281 were randomly assigned to three treatments: muted, sham-operated and unmanipulated

282 males. Males were muted with a small surgery after they were anaesthetized with a  
283 benzocaine solution ( $0.1 \text{ g l}^{-1}$ ) for few minutes. A small incision in the abdominal area  
284 was made and the swimbladder was deflated through a small cut to prevent sound  
285 production. The abdominal opening was then closed with two stitches. To control for  
286 possible effects of the surgery on toadfish territorial behaviour (apart from the ability to  
287 vocalise) a sham-operated treatment was also used. Sham-operated fish were given the  
288 same procedure as the muted group, except for the actual swimbladder cutting and  
289 deflation, and were still able to vocalize normally. Fish were allowed to recover from  
290 anaesthesia before being placed in the experimental tanks. Resident test males from the  
291 unmanipulated group did not experience any surgical intervention and controlled for  
292 possible effects of anaesthesia and surgery procedures. The muting procedure was  
293 effective as muted males did not make sounds during trials and the number of resident-  
294 intruder interactions with sound production did not differ between vocal groups (Mann-  
295 Whitney test,  $N_{\text{Sham}}=20$ ,  $N_{\text{unmanip}}=19$ ,  $U=154.5$ ,  $P>0.05$ ; Table 1).

296 Two males from the same experimental group were placed in an experimental  
297 tank at least 24 h before the experiments, allowing them to become territorial and  
298 recover from possible short time surgery effects. Each experimental tank was provided  
299 with two roof tiles as shelters (internal dimensions 44 cm x 18 cm x 10 cm) placed  
300 approximately 50 cm apart and 20 cm away from the tank's border. All subject males  
301 readily occupied the empty shelters and spent most of the time inside them, a normal  
302 territorial fish behaviour (Vasconcelos et al., 2010). We placed one hydrophone (High  
303 Tech 94 SSQ, High Tech Inc., Gulfport, MS, USA; frequency response: 30 Hz to 6 kHz  
304  $\pm 1$  dB; voltage sensitivity:  $-165$  dB re.  $1 \text{ V}/\mu\text{Pa}$ ) in front of each nest, at about 10 cm  
305 from its entrance and from the tank bottom, attached to a wooden rod kept over the  
306 tank. Simultaneous two channel recordings were made with a USB audio capture device  
307 (Edirol UA-25, Roland, Osaka, Japan; 16 bit, 44.1 kHz acquisition rate per channel)  
308 connected to a laptop and down-sampled to 6 kHz by Adobe Audition 3.0 (Adobe  
309 Systems, San José, CA, USA). Recorded sounds could be attributed to a particular  
310 territorial male because of the proximity of each hydrophone to one nest. Usually, only  
311 territorial males produce sounds (Vasconcelos et al. 2010). In one exception (Amorim,  
312 M.C.P.A, unpublished data), we observed one intruder producing boatwhistles during  
313 intrusions but the resident's and the intruder's sounds could clearly be distinguished due  
314 to spectral differences.

315 In each trial, two intruder males (unmanipulated) were placed sequentially in the  
316 experimental tank with an interval of 30 min between intrusions and remained in the tank  
317 until the end of the trial (following Vasconcelos et al., 2010). Our experimental design  
318 resembles the natural chorusing aggregations, where territorial males nest very close  
319 together (Amorim et al., 2010b) and may attract several competitor males (Vasconcelos  
320 et al., 2012). It also aimed to increase the motivation of subject males to become  
321 territorial and the number of territorial defence interactions during trials, thus decreasing  
322 the need for a larger number of operated males. The first intruder was not removed  
323 when the second was introduced in the tank to avoid disturbing resident males. Intruders  
324 were chosen randomly from stock tanks but in most cases residents and intruders were  
325 matched in total length (TL) (mean total length difference resident TL/intruder TL\*100 =  
326 7%; median = 1%; range: -20% – 67%) with only 9 out of 57 residents experiencing size  
327 asymmetries larger than 20%. Fish were labelled with marks in the fins (i.e. a small cut  
328 between the fin rays) to identify them during trials. Marking did not cause any  
329 measurable change in behaviour. Behavioural interactions and sound produced were  
330 registered for 60 min beginning with the placement of the first intruder male. After each  
331 trial all specimens were measured for total length (TL) to the nearest mm and weighed to  
332 the nearest g.

333 We used a total of 18, 20 and 19 resident males for the muted, sham-operated and  
334 unmanipulated treatments, with a mean (range) TL of 41.3 (32.4–48.0) cm, 43.9 (36.6–  
335 50.0) cm and 40.5 (26.8–47.0) cm, respectively. We used a total of 64 intruders with a  
336 mean (range) TL of 39.5 (27.0–50.0) cm.

337

338

### Behavioural analysis

339 Behaviour of residents and intruders was assessed by direct observation, noted on paper  
340 and later tallied following Vasconcelos et al. (2010). Sound production was  
341 simultaneously monitored with headphones that were connected to the recording laptop.  
342 For residents we registered the number of non-escalated behaviours including mouth  
343 opening with the extension of pectoral fins and opercula and escalated behaviours  
344 including chasing, bite attempts, bites and mouth–mouth fight. The number of times  
345 residents showed no apparent reaction ('no reaction', i.e. no visible or audible behaviour)  
346 upon and intruder's approach or nest intrusion was also measured. We also tallied the  
347 duration of resident-intruder interactions and the sequence of interactions as fighting  
348 duration is an important measurement of mutual assessment (Enquist and Leimar, 1983).

349 An interaction was considered a set of consecutive behaviours involving one resident and  
350 one intruder that started with the latter approaching or intruding the nest and stopped  
351 when he fled to the border of the tank or took over the nest. A sequence of interactions  
352 were a set of consecutive interactions involving the same resident and intruder that were  
353 not interrupted by an interaction with another male (usually the other intruder) and that  
354 finished with either the intruder fleeing and not further resuming the interaction or with a  
355 nest takeover. We tallied the number of sounds emitted by the resident including  
356 agonistic boatwhistles or other sound types (grunts, long grunt trains, croaks and double  
357 croaks; see Amorim et al., 2008 for a description). For the intruders we tallied the  
358 number of approaches, intrusions in the nest (the intruder entering partially or  
359 completely) and fleeing. We defined approaches when the intruder was at least within a  
360 body length from the nest and an intrusion when the intruders managed to get at least  
361 part of the body inside the nest. Fleeing consisted in swimming away from the nest.  
362 These categories are mutually exclusive but may be performed sequentially.

363

364

### Statistical analysis

365 Statistical tests were performed with Statistica 12.0 for Windows (StatSoft, Inc., Tulsa,  
366 OK, USA), and all data were transformed when necessary to meet assumptions of the  
367 used parametric tests. When there was no normality of the transformed data, non-  
368 parametric tests were used.

369 We compared the number of approaches, intrusions and total interactions  
370 (approach + intrusion) experienced by the different treatment groups with Kruskal-  
371 Wallis tests. Similarly the responses of the residents ('no reaction' and escalated fights)  
372 were compared among treatment groups with Kruskal-Wallis tests. Post-hoc tests  
373 available in Statistica and described in Siegel and Castellan (1988) were used for  
374 multiple comparisons between treatments.

375 The effect of treatment on interaction and sequence of interaction durations was  
376 tested with one-way ANOVA. We tested whether the production of boatwhistles altered  
377 interaction duration with a two-way ANOVA that included the factor interaction type  
378 (with three levels: approach, intrusion and approach+intrusion) and the factor  
379 boatwhistle production (two levels: vocal and silent). We finally compared sequence of  
380 interaction durations until nest takeover among treatment groups. Interaction and  
381 sequence of interaction durations were log-transformed to meet the ANOVA  
382 assumptions.

383 A chi-square test of independence was performed to test if when there was an  
384 intrusion, the variable nest takeover (nest takeover *vs.* no takeover) was independent of  
385 vocalising (vocal *vs.* muted). The probability of the intruder fleeing after receiving a  
386 boatwhistle or an escalated attack by the resident, when approaching or intruding its nest,  
387 was compared to what was expected to happen at random with binomial tests.

### 388 389 390 **LIST OF ABBREVIATIONS**

391 TL – Total length; BW – boatwhistle; NR – ‘No reaction’; EF – Escalated fight.

### 392 393 394 **ACKNOWLEDGEMENTS**

395 We thank the Air Force Base No. 6 of Montijo (Portugal) for allowing this study in their  
396 military establishment. We are grateful to Andreia Ramos for the help with the field  
397 work. We thank Bruno Novais for analysing components of the behavioural data. We are  
398 also grateful to the referees who contributed to improve this paper. All experimental  
399 procedures comply with Portuguese animal welfare laws, guidelines and policies. The  
400 authors declare they have no conflicts of interest.

### 401 402 403 **AUTHOR CONTRIBUTIONS**

404 M.C.P.A. and P.J.F. were involved in conception of the study and experimental design.  
405 C.C. conducted the study. M.C.P.A. carried out statistical analyses. M.C.P.A and C.C.  
406 drafted the article. All authors revised the article.

### 407 408 409 **COMPETING INTERESTS**

410 No competing interests declared.

### 411 412 413 **FUNDING**

414 This study was funded by Science and Technology Foundation, Portugal (project  
415 PTDC/MAR/118767/2010, pluriannual program UI&D 331/94 and UI&D 329, grant  
416 SFRH/BPD/41489/2007 to M.C.P.A).

## REFERENCES

- Amorim, M. C. P. and Hawkins, A. D.** (2005). Ontogeny of acoustic and feeding behaviour in the grey gurnard, *Eutrigla gurnardus*. *Ethology* **111**, 255-269.
- Amorim, M. C. P. and Neves, A. S. M.** (2008). Male painted gobies (*Pomatoschistus pictus*) vocalise to defend territories. *Behaviour* **145**, 1065-1083.
- Amorim, M. C. P., Simões, J. M. and Fonseca, P. J.** (2008). Acoustic communication in the Lusitanian toadfish, *Halobatrachus didactylus*: evidence for an unusual large vocal repertoire. *J. Mar. Biol. Assoc. UK* **88**, 1069-1073.
- Amorim, M. C. P., Vasconcelos, R. O., Marques, J. F. and Almada, F.** (2006). Seasonal variation of sound production in the Lusitanian toadfish, *Halobatrachus didactylus*. *J. Fish Biol.* **69**, 1892-1899.
- Amorim, M. C. P., Simões, J. M., Mendonça, N., Bandarra, N. M., Almada, V. C. and Fonseca, P. J.** (2010a). Lusitanian toadfish song reflects male quality. *J. Exp. Biol.* **213**, 2297-3004.
- Amorim, M. C. P., Simões, J. M., Fonseca, P. J. and Almada, V. C.** (2010b). Patterns of shelter usage and social aggregation by the vocal Lusitanian toadfish. *Mar. Biol.* **157**, 495-503.
- Amorim, M. C. P., Pedroso, S. S., Bolgan, M., Jordão, J. M., Caiano, M. and Fonseca, P. J.** (2013). Painted gobies sing their quality out loud: acoustic rather than visual signals advertise male quality and contribute to mating success. *Funct. Ecol.* **27**, 289-298.
- Arnott, G. and Elwood, R. W.** (2009). Assessment of fighting ability in animal contests. *Anim. Behav.* **77**, 991-1004
- Bradbury J. W. and Vehrencamp, S. L.** (1998). *Principles of animal communication*. Sunderland (MA): Sinauer Associates.
- Clutton-Brock, T. H. and Albon, S. D.** (1979). The roaring of red deer and the evolution of honest advertisement. *Behaviour* **69**, 145-169.
- Cocroft, R. B. and Ryan, M. J.** (1995). Patterns of advertisement call evolution in toads and chorus frogs. *Anim. Behav.* **49**, 283-303.
- Connaughton, M. A., Taylor, M. H. and Fine, M. L.** (2000). Effects of fish size and temperature on weakfish disturbance calls: implications for the mechanism of sound generation. *J. Exp. Biol.* **203**, 1503-1512.
- Davies, N. B. and Halliday, T. R.** (1978). Deep croaks and fighting assessment in toads *Bufo bufo*. *Nature* **274**, 683-685.

- dos Santos, M. E., Modesto, T., Matos, R. J., Grober, M. S., Oliveira, R. F. and Canário, A.** (2000). Sound production by the Lusitanian toadfish, *Halobatrachus didactylus*. *Bioacoustics* **10**, 309-321.
- Enquist, M. and Leimar, O.** (1983). Evolution of fighting behaviour: decision rules and assessment of relative strength. *J. Theor. Biol.* **102**, 387-410.
- Enquist, M. and Leimar, O.** (1987). Evolution of fighting behaviour: the effect of variation in resource value. *J. Theor. Biol.* **127**, 187-205.
- Krebs, J. R.** (1976). Bird song and territorial defence. *New Scientist*, **70**, 534-536.
- Krebs, J. R., Ashcroft, R. and Webber, M.** (1978). Song repertoires and territory defence in the great tit. *Nature (London)* **127**, 539-542.
- Kriegbaum, H. and von Helversen, O.** (1992). Influence of male songs on female mating behavior in the grasshopper *Chorthippus biguttulus* (Orthoptera: Acrididae). *Ethology* **91**, 248-254.
- Ladich, F.** (1998). Sound characteristics and outcome of contests in male croaking gouramis (Teleostei). *Ethology* **104**, 517-529.
- Ladich, F. and Fine, M. L.** (2006). Sound-generating mechanisms in fishes: a unique diversity in vertebrates. In *Communication in fishes* (eds. F. Ladich, S. P. Collin, P. Moller and B. G. Kapoor), Vol. 1, pp. 3-43. Enfield (NH): Science Publishers.
- Ladich, F. and Myrberg, A. A. Jr.** (2006). Agonistic behaviour and acoustic communication. In *Communication in fishes* (eds. F. Ladich, S. P. Collin, P. Moller and B. G. Kapoor), Vol. 1, pp. 122-148. Enfield (NH): Science Publishers.
- Ladich, F., Brittinger, W. and Kratochvil, H.** (1992). Significance of agonistic vocalization in the croaking gourami (*Trichopsis vittatus*, Teleostei). *Ethology* **90**, 307-314.
- Lindström, K. and Lugli, M.** (2000). A quantitative analysis of the courtship acoustic behaviour and sound patterning in male sand goby, *Pomatoschistus minutus*. *Environ. Biol. Fish.* **58**, 411-424.
- Lobel, P. S. and Mann, D. A.** (1995). Spawning sounds of the damselfish, *Dascyllus albisella* (Pomacentridae), and relationship to male size. *Bioacoustics* **6**, 187-198.
- McDonald, M. V.** (1989). Function of song in Scott's seaside sparrow, *Ammodramus maritimus peninsulae*. *Anim. Behav.* **38**, 468-485.
- McGregor, P. K.** (1992). *Playback and Studies of Animal Communication*. New York: Plenum Press.

- Modesto, T. and Canário, A. V. M.** (2003). Morphometric changes and sex steroid levels during the annual reproductive cycle of the Lusitanian toadfish, *Halobatrachus didactylus*. *Gen. Comp. Endocrinol.* **131**, 220-231.
- Myrberg, A. A. Jr.** (1997). Sound production by a coral reef fish (*Pomacentrus partitus*): Evidence for a vocal, territorial “keep-out” signal. *Bull. Mar. Sci.* **60**, 1017-1025.
- Myrberg, A. A. Jr., Ha, S. J. and Shablott, H. S.** (1993). The sounds of bicolor damselfish (*Pomacentrus partitus*): predictors of body size and a spectral basis for individual recognition and assessment. *J. Acoust. Soc. Amer.* **94**, 3067-3070.
- Parker, G. A.** (1974). Assessment strategy and evolution of fighting behaviour. *J. Theor. Biol.* **47**, 223–243.
- Pedroso, S. S., Barber, I., Svensson, O., Fonseca, P. J. and Amorim, M. C. P.** (2013). Courtship sounds advertise species identity and male quality in sympatric *Pomatoschistus* spp. Gobies. *PloS One* **8**, e64620.
- Pereira, R., Rismondo, S., Caiano, M., Pedroso, S.S., Fonseca, P. J. And Amorim, M. C. P.** (2014). The role of agonistic sounds in male nest defence in the painted goby *Pomatoschistus pictus*. *Ethology* **120**, 53-63.
- Prestwich, K. N.** (1994). The energetics of acoustic signalling in anurans and insects. *Am. Zool.* **34**, 625-643.
- Raffinger, E. and Ladich, F.** (2009). Acoustic threat displays and agonistic behaviour in the red-finned loach *Yasuhikotakia modesta*. *J. Ethol.* **27**, 239-247.
- Ramos, A., Fonseca, P. J., Modesto, T., Almada, V. C. and Amorim, M. C. P.** (2012). Alloparental behavior in the highly vocal Lusitanian toadfish. *J. Exp. Mar. Biol. Ecol.* **434–435**, 58-62.
- Rigley, L. and Muir, J.** (1979). The role of sound production by the brown bullhead *Ictalurus nebulosus*. *Proc. Pennsylv. Acad. Sci.* **53**, 132-134.
- Roux, C.** (1986). Batrachoididae. In *Fishes of the North-Eastern Atlantic and Mediterranean* (eds. P. J. P. Whitehead, M. L. Bauchot, J. C. Hureau, J. Nielsen and E. Tortonese), pp. 1360-1361. Paris: UNESCO.
- Searcy, W. A. and Beecher, M. D.** (2009). Song as an aggressive signal in songbirds. *Anim. Behav.* **78**, 1281-1292.
- Siegel, S. and Castellan, N. J., Jr.** (1988). *Nonparametric Statistics for The Behavioral Sciences*. 2nd edn. McGraw-Hill International Editions, Singapore: McGraw-Hill Book Company.



- Skoglund, C. R.** (1961). Functional analysis of swimbladder muscles engaged in sound production in the toadfish. *J. Biophys. Biochem. Cytol.* **10**, 187-200.
- Turner, G. F. and Huntingford, F. A.** (1986). A problem for game theory analysis: assessment and intention in male mouthbrooder contests. *Anim. Behav.* **34**, 961-970.
- Valinsky, W. and Rigley L.** (1981). Function of sound production by the skunk loach *Botia horae* (Pisces. Cobitidae). *Z. Tierpsychol.* **55**, 161-172.
- Vasconcelos, R. O., Simões, J. M., Almada, V. C., Fonseca, P. J. and Amorim, M. C. P.** (2010). Vocal behavior during territorial intrusions in the Lusitanian toadfish: Boatwhistles also function as territorial 'keep-out' signals, *Ethology* **116**, 155-165.
- Vasconcelos R. O., Carriço, R., Ramos, A., Modesto, T., Fonseca, P. J. and Amorim, M. C. P.** (2012). Vocal behavior predicts reproductive success in a teleost fish. *Behav. Ecol.* **23**, 375-383.
- Wyman, M. T., Mooring, M. S., McCowan, B., Penedo, M. C. T. and Hart, L. A.** (2008). Amplitude of bison bellows reflects male quality, physical condition and motivation. *Anim. Behav.* **76**, 1625-1639.
- Wysocki, L. E. and Ladich, F.** (2001). The ontogenetic development of auditory sensitivity, vocalization and acoustic communication in the labyrinth fish *Trichopsis vittata*. *J. Comp. Physiol. A* **187**, 177-187.

417 **Table 1.** Mean percentage of reactions to intruder’s approaches and nest intrusions: ‘no  
 418 reaction’ (NR), sounds (BW), Escalated fights (EF), and sound followed by escalated  
 419 fights (BW+EF). Percentages were calculated per fish and then averaged. *N* – Number of  
 420 fish that experienced an approach or an intrusion.

421  
 422

| <b>Approach</b>  | <b>Treatment</b>     | <b>NR</b> | <b>BW</b> | <b>EF</b> | <b>BW+EF</b> | <b><i>N</i></b> |
|------------------|----------------------|-----------|-----------|-----------|--------------|-----------------|
|                  | <b>Muted</b>         | 81.25     | --        | 18.25     | --           | 4               |
|                  | <b>Sham</b>          | 39.6      | 56.6      | 3.8       | 0            | 13              |
|                  | <b>Unmanipulated</b> | 4.2       | 95.8      | 0         | 0            | 8               |
| <b>Intrusion</b> |                      |           |           |           |              |                 |
|                  | <b>Muted</b>         | 64.2      | --        | 35.8      | --           | 18              |
|                  | <b>Sham</b>          | 32.2      | 37.7      | 20.7      | 9.4          | 17              |
|                  | <b>Unmanipulated</b> | 43.1      | 23.3      | 25.9      | 7.7          | 13              |

423  
 424

425 **FIGURE LEGENDS**

426

427 **Fig. 1. Number of approaches, intrusions and interactions experienced by resident**  
428 **males of the three treatment groups: muted, sham-operated and unmanipulated.**

429 Dots indicate medians while boxes and error bars depict quartiles and range. Different  
430 letters indicate pairwise differences given by post-hoc Kruskal-Wallis tests. In the case  
431 of approaches differences are marginally non-significant ( $P = 0.06$ ) and for intrusions  
432 differences are significant at the level of  $P < 0.01$ .

433

434 **Fig. 2. Number of times muted, sham-operated and unmanipulated resident males**  
435 **showed ‘no reaction’ or engaged in escalated fight when approached by intruders.**

436 Dots indicate medians while boxes and error bars depict quartiles and range. Treatment  
437 had only a significant effect of on the number of ‘no reactions’ (Kruskal-Wallis test,  $P <$   
438  $0.05$ ). Post-hoc tests indicated only a marginally non-significant difference ( $P = 0.07$ )  
439 between muted and unmanipulated males for ‘no reaction’.

440

441 **Fig. 3. Number of times muted, sham-operated and unmanipulated male residents**  
442 **showed ‘no reaction’ or engaged in escalated fight upon intrusions.** Dots indicate

443 medians while boxes and error bars depict quartiles and range. Different letters denote  
444 pairwise significant differences at  $P < 0.01$ .

445

446 **Fig. 4. Mean (and standard deviation) duration (s) of resident-intruder interactions,**  
447 **sequence of interactions, and of sequence of interactions that lead to nest takeover.**

448 Temporal patterns of the dynamics of territorial defence did not differ among groups  
449 (one way ANOVA,  $P > 0.05$ ). See methods for details on duration measurements.

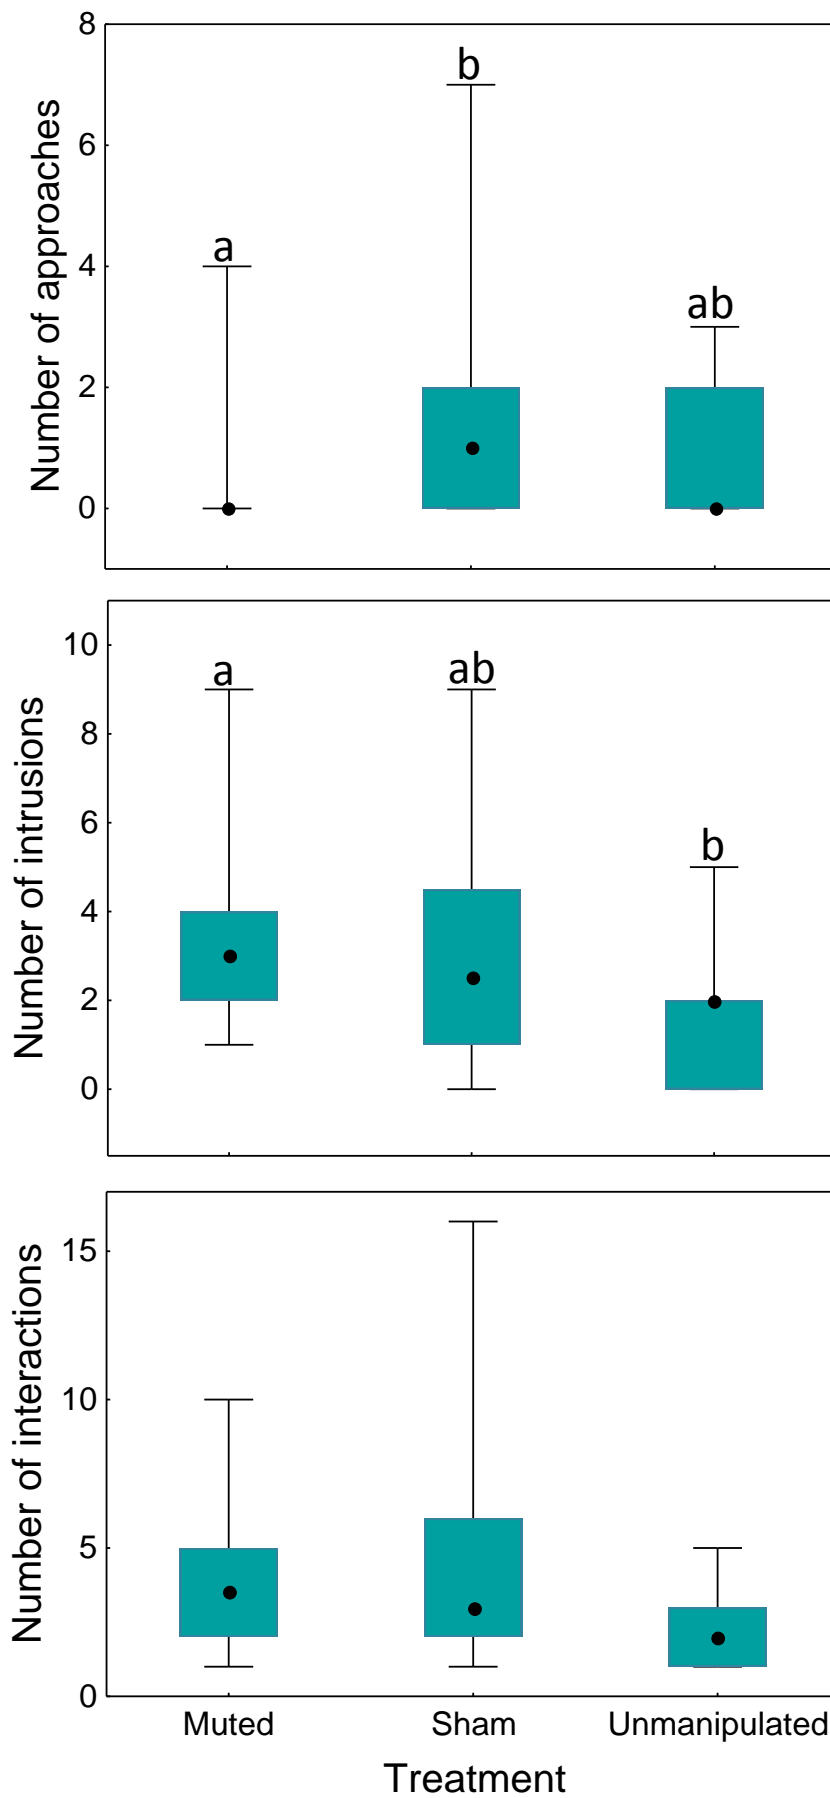

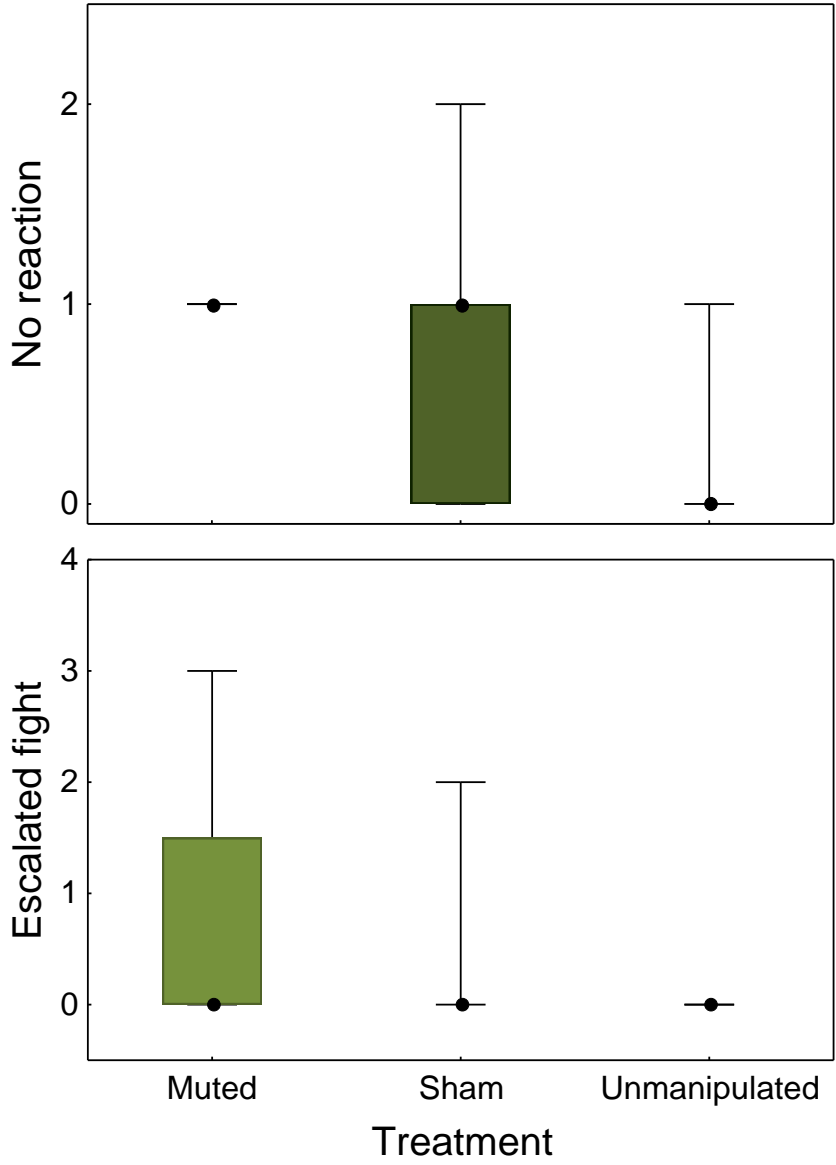

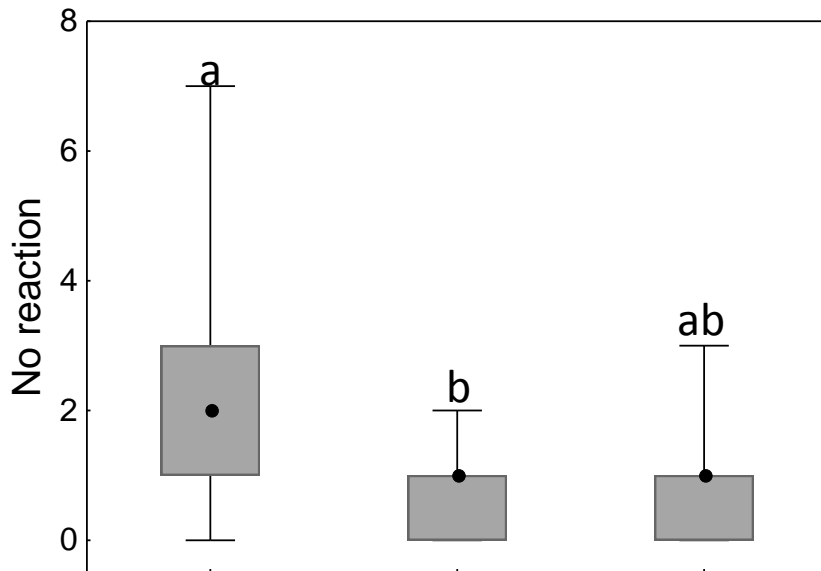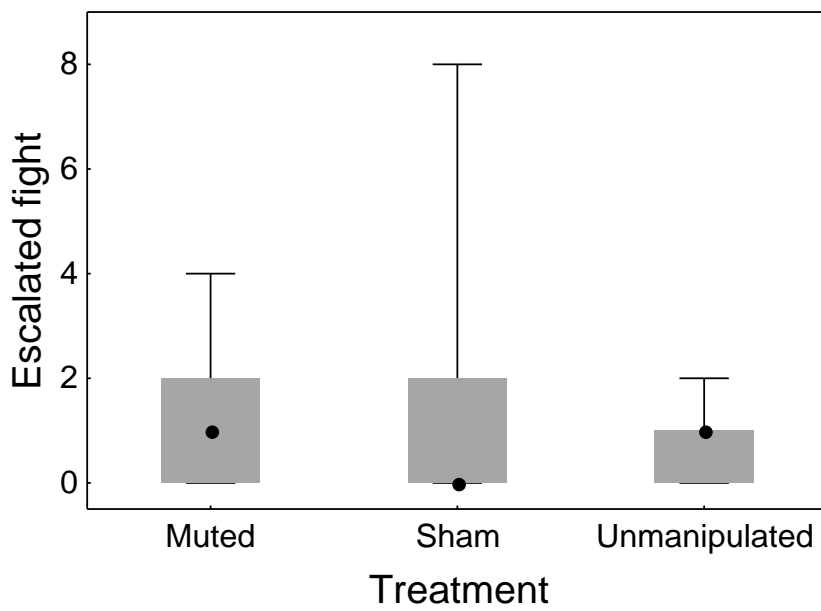

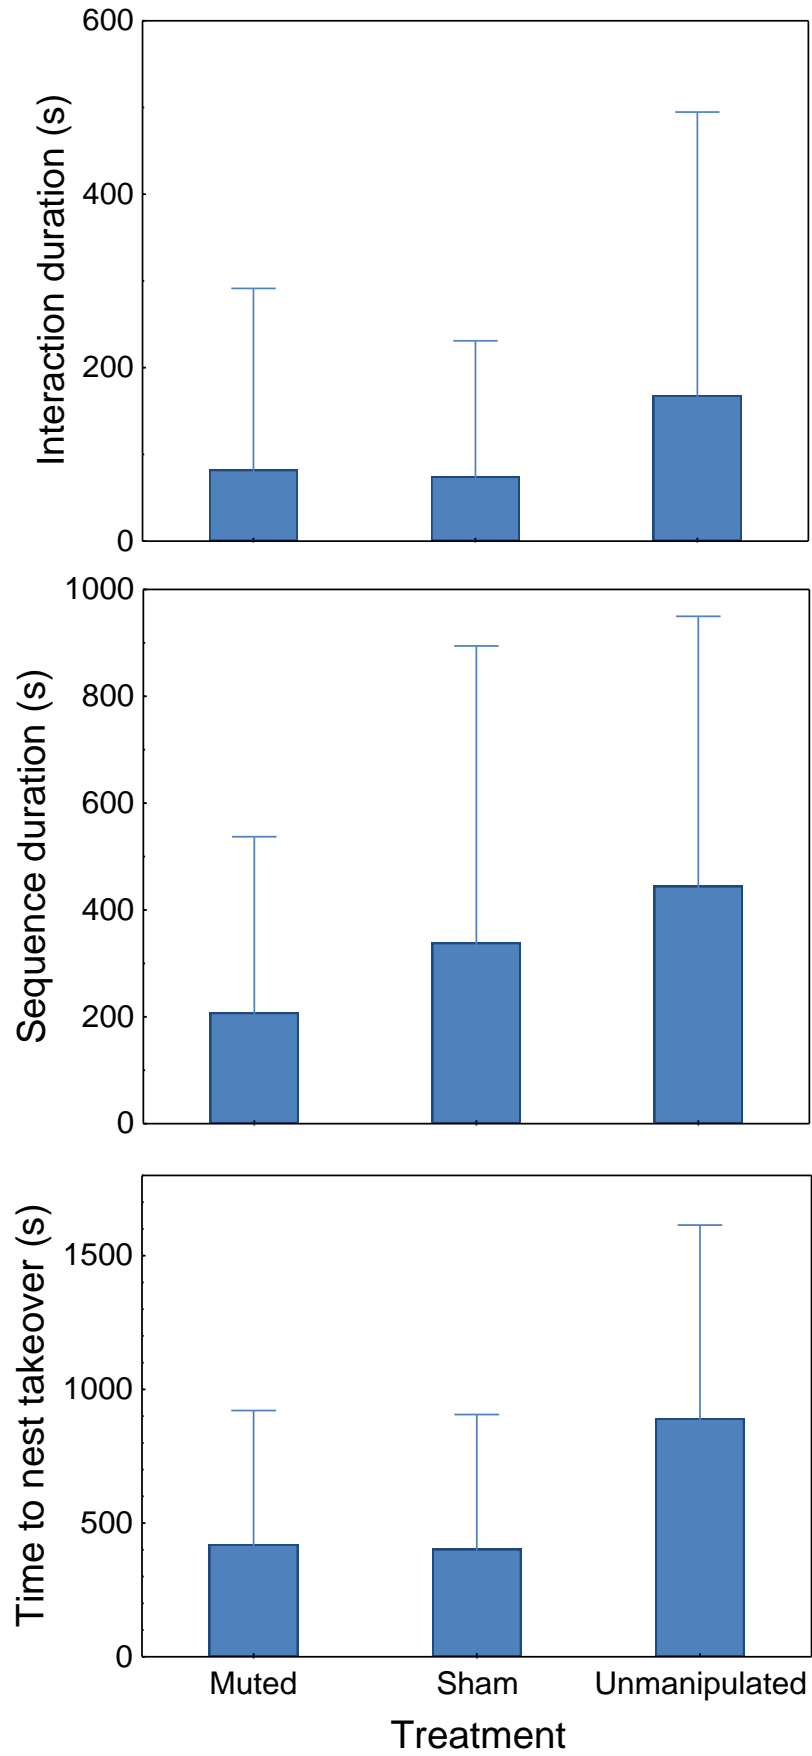

Source: https://cob.silverchair.com/jeb/article-pdf/doi/10.1242/jeb.116673/2033280/jeb_116673.pdf
